# Supplementary material for: Impact of post-synthesis modification of nanoporous organic frameworks on small gas uptake and selective CO2 capture
Source: Royal Society of Chemistry journal article supplement (doi:10.1039/c3ta12305g), 2013-01-01
Supplement: c3ta12305g.pdf [file c3ta12305g.pdf]

## ***Electronic Supplementary Information***

### **Impact of post-synthesis modification of nanoporous organic frameworks on small gas uptake and selective CO<sub>2</sub> capture**

Timur İslamoğlu, Mohammad Gulam Rabbani and Hani M. El-Kaderi\*

*Department of Chemistry, Virginia Commonwealth University, Richmond, Virginia 23284-2006,  
United States*

\*To whom correspondence should be addressed. E-Mail: [helkaderi@vcu.edu](mailto:helkaderi@vcu.edu)

#### **Contents**

|                                                                                                        |            |
|--------------------------------------------------------------------------------------------------------|------------|
| <b><i>Section S1: NMR Spectral Characterization of Starting Building Unit</i></b> .....                | <b>S3</b>  |
| <sup>1</sup> H NMR spectrum for 1,3,5,7-tetrakis(4-acetylphenyl)adamantane in CDCl <sub>3</sub> .....  | S3         |
| <sup>13</sup> C NMR spectrum for 1,3,5,7-tetrakis(4-acetylphenyl)adamantane in CDCl <sub>3</sub> ..... | S4         |
| <b><i>Section S2: Synthesis and Characterization of Polymers</i></b> .....                             | <b>S5</b>  |
| Synthetic scheme for TAPA, NPOF-4, NPOF-4-NO <sub>2</sub> and NPOF-4-NH <sub>2</sub> . ....            | S5         |
| TGA traces for polymers. ....                                                                          | S6         |
| SEM images for polymers. ....                                                                          | S7         |
| PXRD-patterns for polymers .....                                                                       | S8         |
| FT-IR spectra of TAPA, NPOF-4, NPOF-4-NO <sub>2</sub> and NPOF-4-NH <sub>2</sub> . ....                | S9         |
| Solid-state <sup>13</sup> C CP-MAS NMR spectra for polymers .....                                      | S10        |
| <b><i>Section 3: Low-Pressure (0 – 1.0 bar) Gas Adsorption Measurements</i></b> . ....                 | <b>S11</b> |
| Argon adsorption isotherm for polymers.....                                                            | S12        |

|                                                                                                                                                   |     |
|---------------------------------------------------------------------------------------------------------------------------------------------------|-----|
| Multipoint BET plot for polymers .....                                                                                                            | S13 |
| Argon adsorption isotherms fittings .....                                                                                                         | S14 |
| CO <sub>2</sub> , CH <sub>4</sub> , and H <sub>2</sub> uptakes for polymers .....                                                                 | S15 |
| Virial analysis of CO <sub>2</sub> adsorption data for polymers .....                                                                             | S16 |
| Virial analysis of CH <sub>4</sub> adsorption data for polymers .....                                                                             | S17 |
| Virial analysis of H <sub>2</sub> adsorption data for polymers.....                                                                               | S18 |
| Initial slope selectivity studies for polymers .....                                                                                              | S19 |
| Hydrogen uptakes, binding affinities for NPOF-4, NPOF-4-NO <sub>2</sub> and NPOF-4-NH <sub>2</sub> .....                                          | S20 |
| CO <sub>2</sub> and N <sub>2</sub> uptakes for selectivity studies of CO <sub>2</sub> /N <sub>2</sub> at 273 and 298 K by using Equation 1. ....  | S20 |
| CO <sub>2</sub> and CH <sub>4</sub> uptakes for selectivity studies of CO <sub>2</sub> /CH <sub>4</sub> at 273 and 298 K by using Equation 1..... | S20 |
| Experimental CO <sub>2</sub> , CH <sub>4</sub> and N <sub>2</sub> isotherms and corresponding fittings at 298 K for polymers.....                 | S22 |
| IAST selectivities of CO <sub>2</sub> /CH <sub>4</sub> (50/50) at 298 K for polymers .....                                                        | S23 |

### Section S1: NMR Spectral Characterization of Starting Building Unit

Figure S1:  $^1\text{H}$  NMR spectrum for 1,3,5,7-tetrakis(4-acetylphenyl)adamantane in  $\text{CDCl}_3$ .

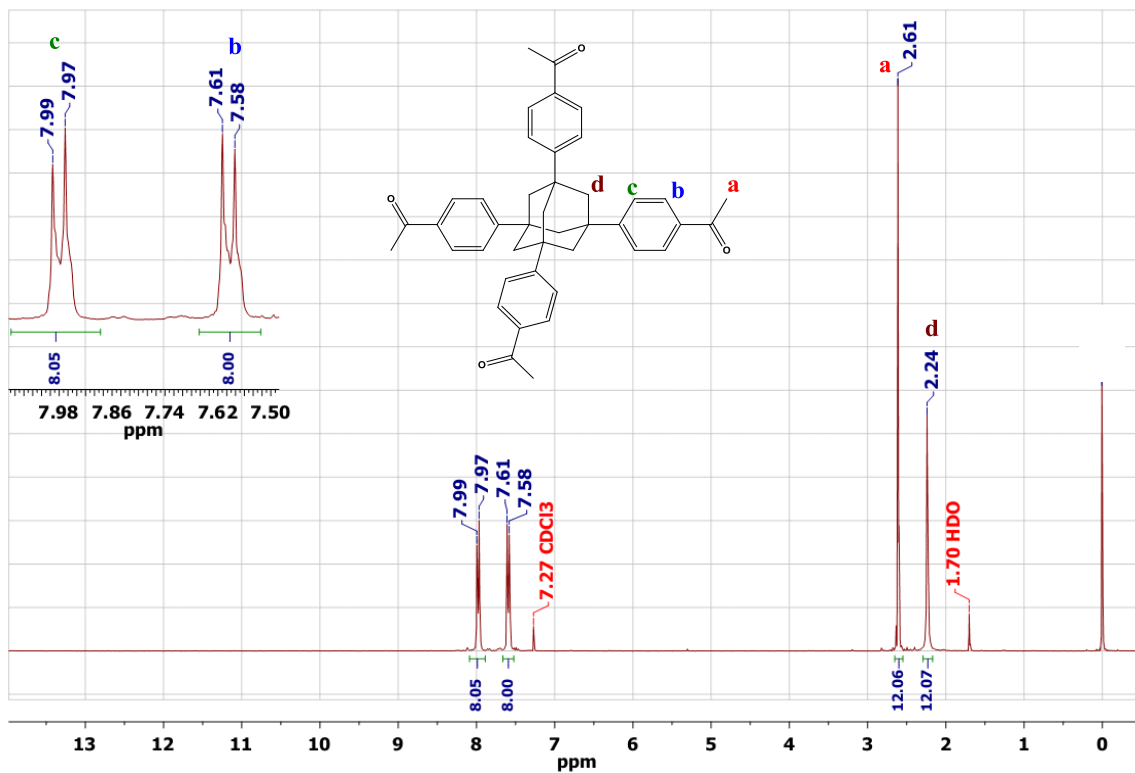

**Figure S2:**  $^{13}\text{C}$  NMR spectrum for 1,3,5,7-tetrakis(4-acetylphenyl)adamantane in  $\text{CDCl}_3$ .

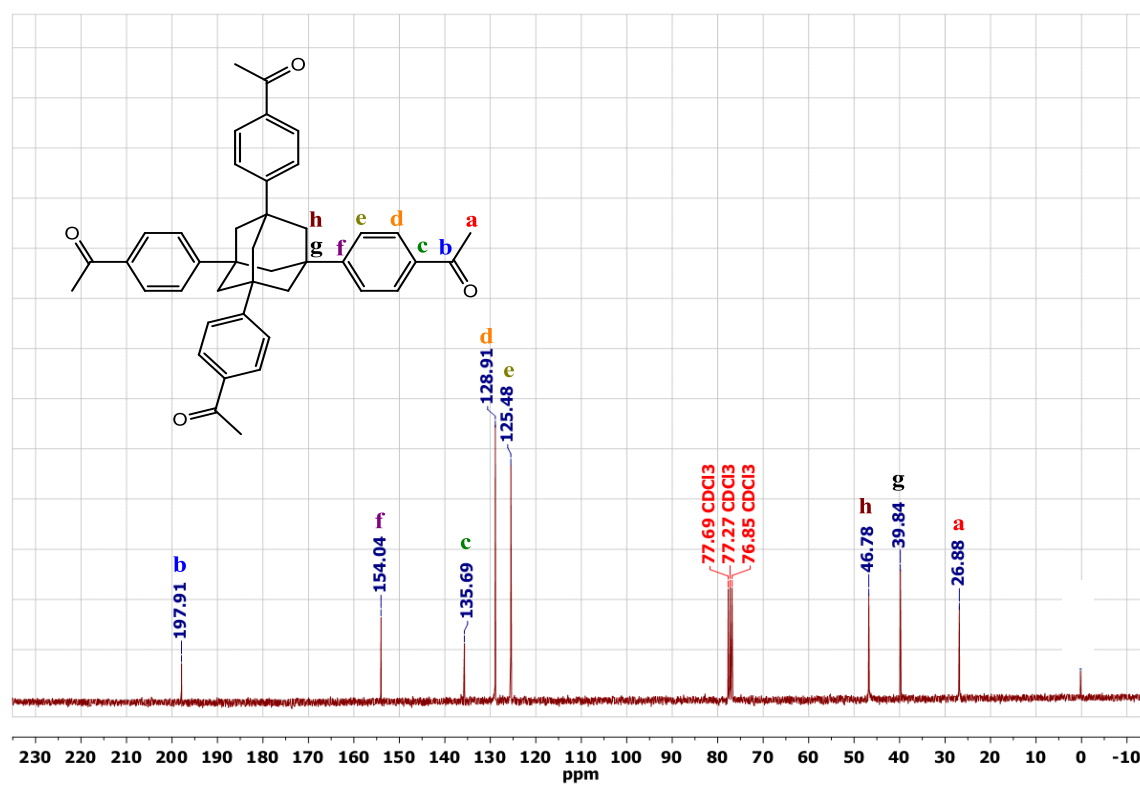

## Section S2: Synthesis and Characterization of Polymers

**Scheme S1:** Synthetic scheme for TAPA, NPOF-4, NPOF-4-NO<sub>2</sub> and NPOF-4-NH<sub>2</sub>.

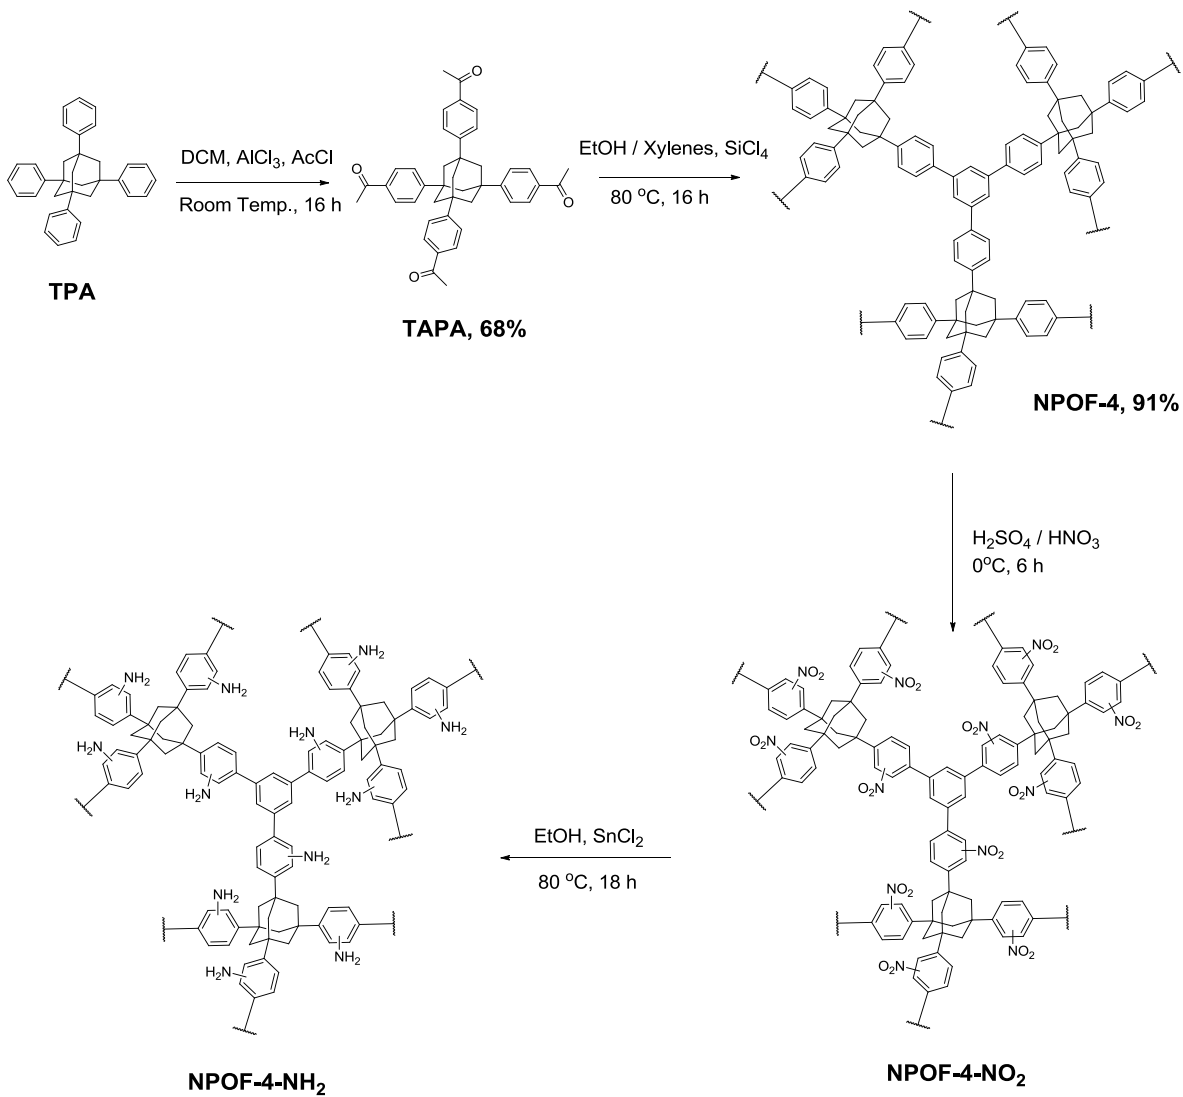

**Figure S3:** TGA traces of NPOF-4, NPOF-4-NO<sub>2</sub> and NPOF-4-NH<sub>2</sub>.

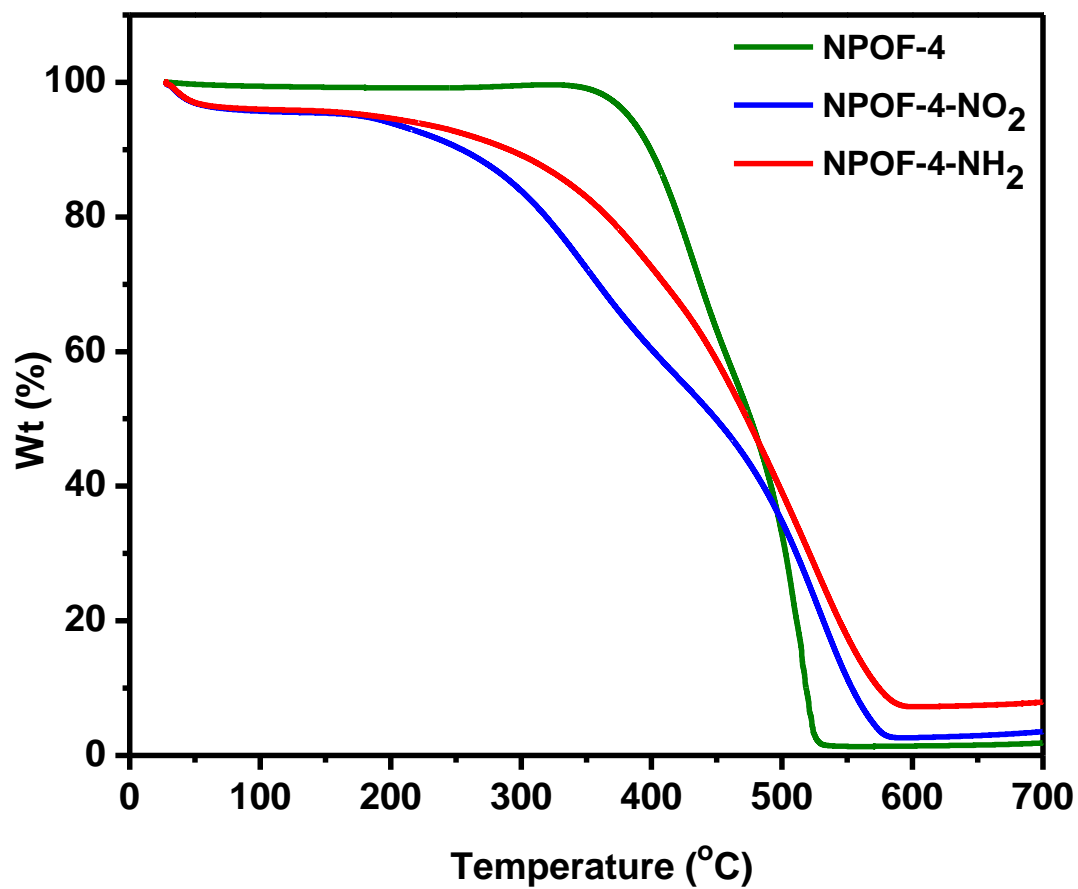

**Figure S4:** SEM images of NPOF-4, NPOF-4-NO<sub>2</sub> and NPOF-4-NH<sub>2</sub>.

**SEM images of NPOF-4**

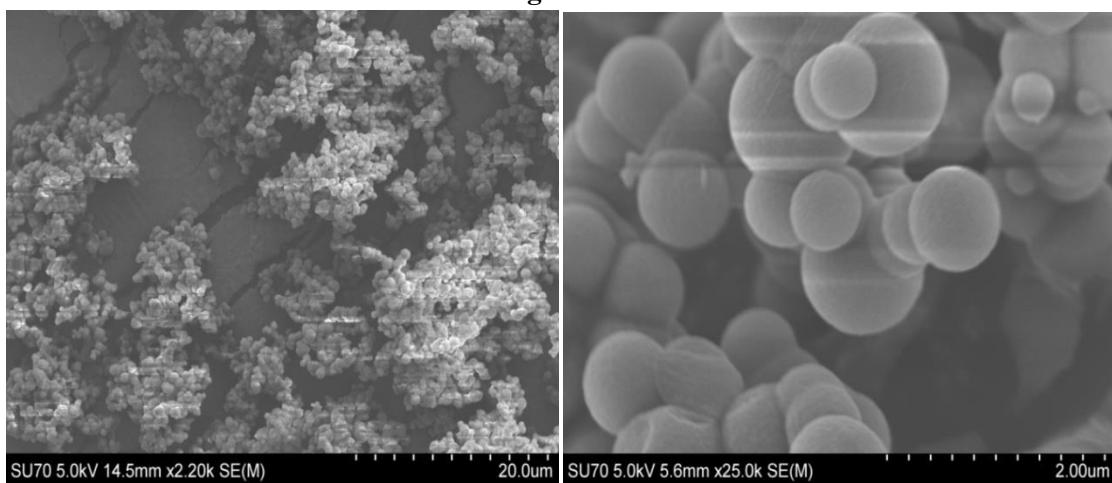

**SEM images of NPOF-4-NO<sub>2</sub>**

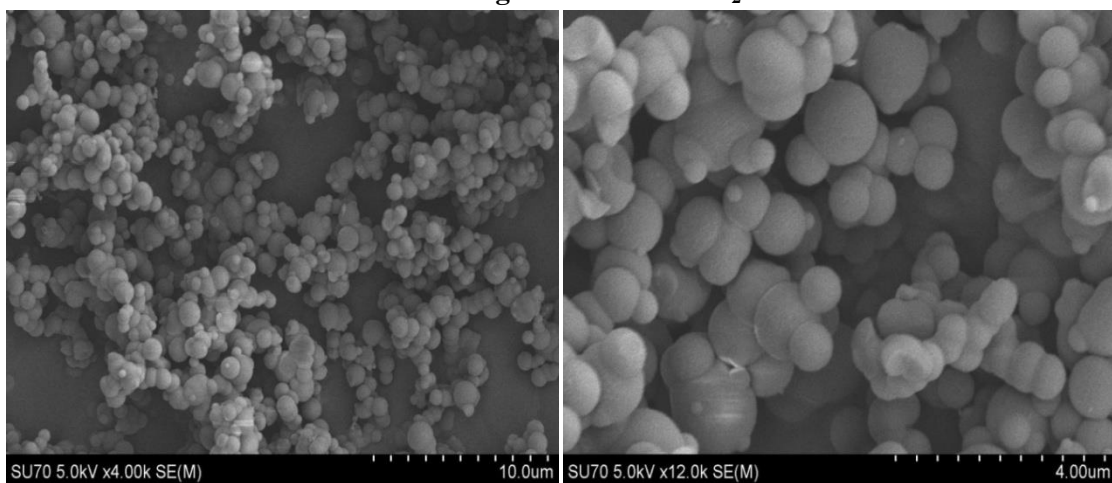

**SEM images of NPOF-4-NH<sub>2</sub>**

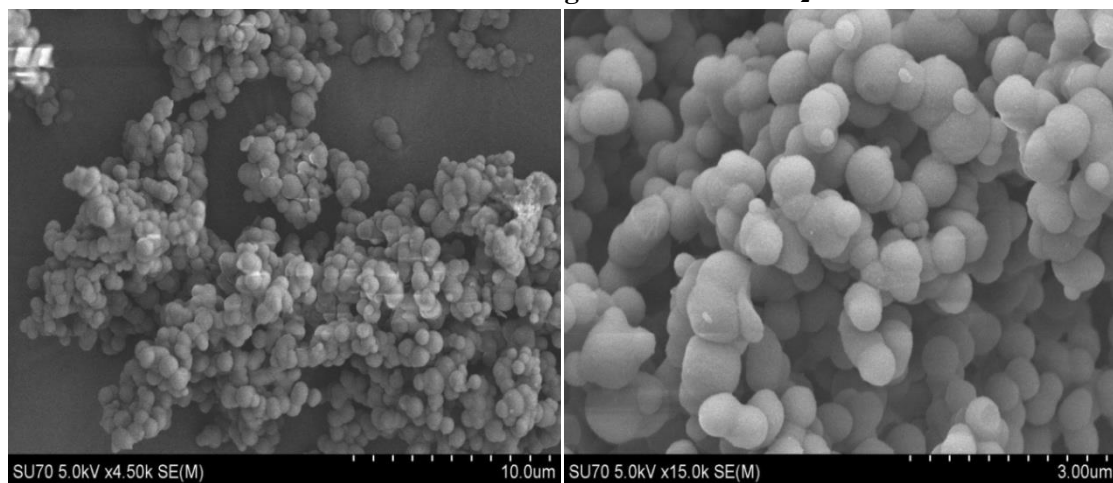

**Figure S5:** PXRD-patterns for NPOF-4, NPOF-4-NO<sub>2</sub>, and NPOF-4-NH<sub>2</sub>.

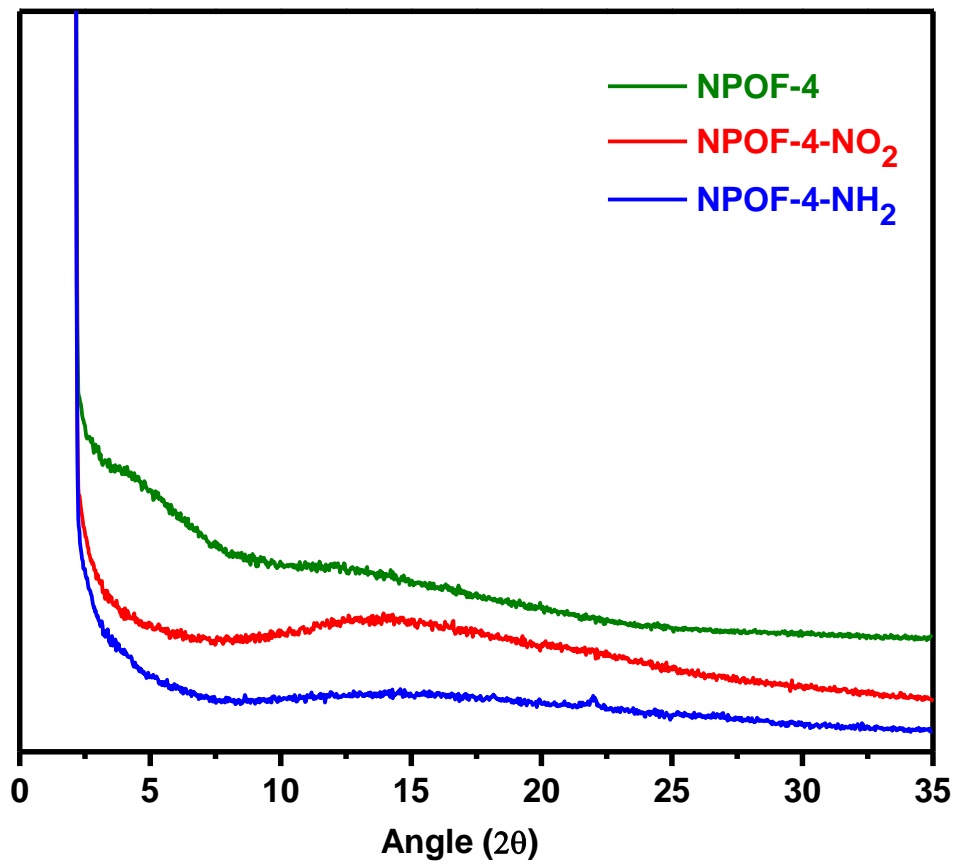



**Figure S6:** FT-IR spectra of TAPA, NPOF-4, NPOF-4-NO<sub>2</sub> and NPOF-4-NH<sub>2</sub>.

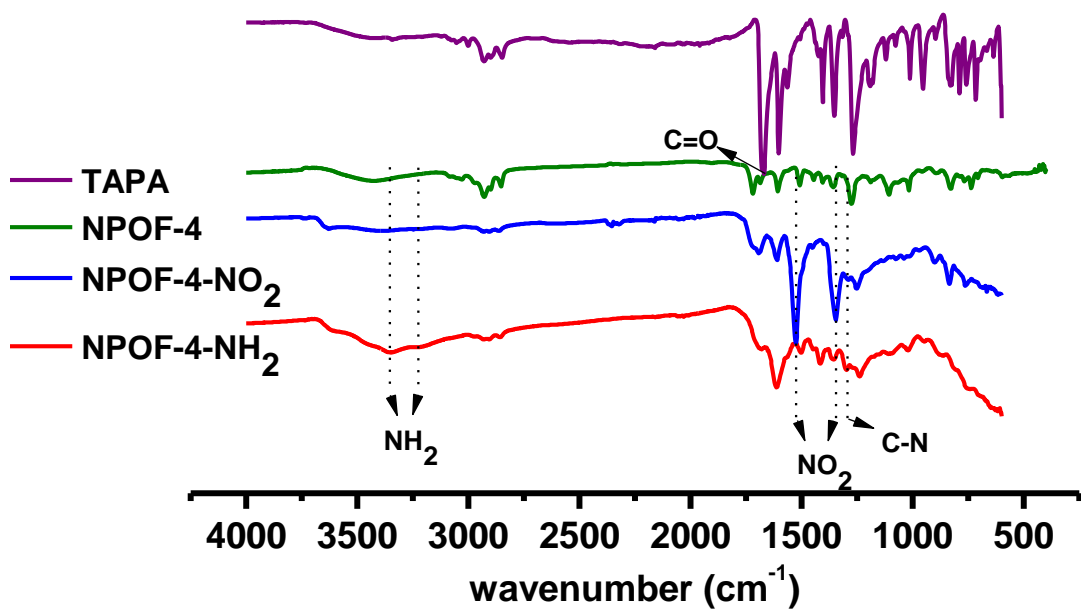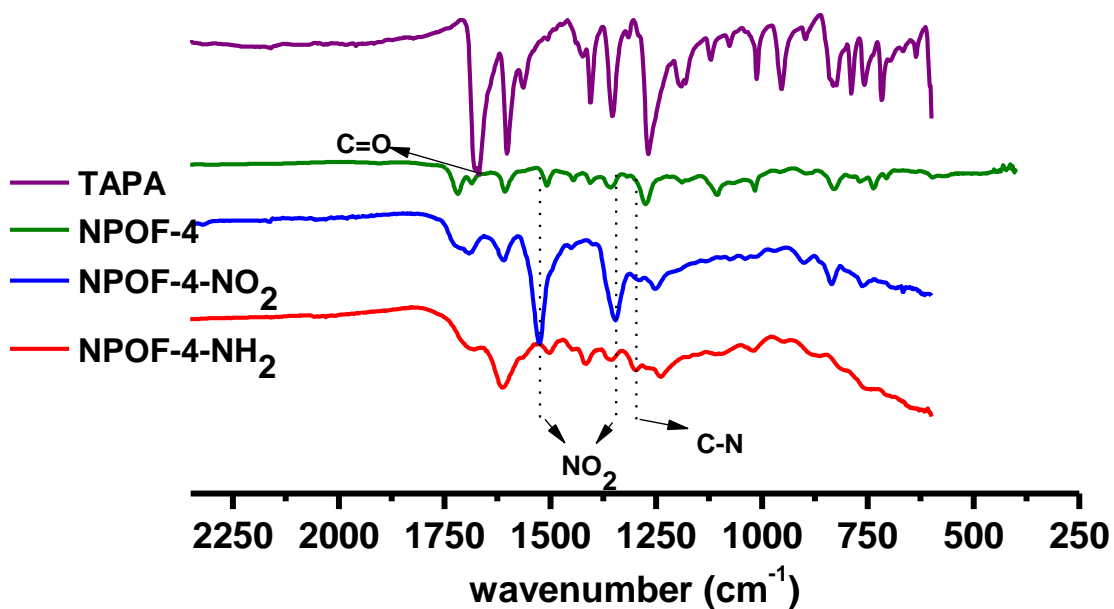

**Figure S7:** Solid-state  $^{13}\text{C}$  CP-MAS NMR spectra of NPOF-4, NPOF-4- $\text{NO}_2$  and NPOF-4- $\text{NH}_2$ .

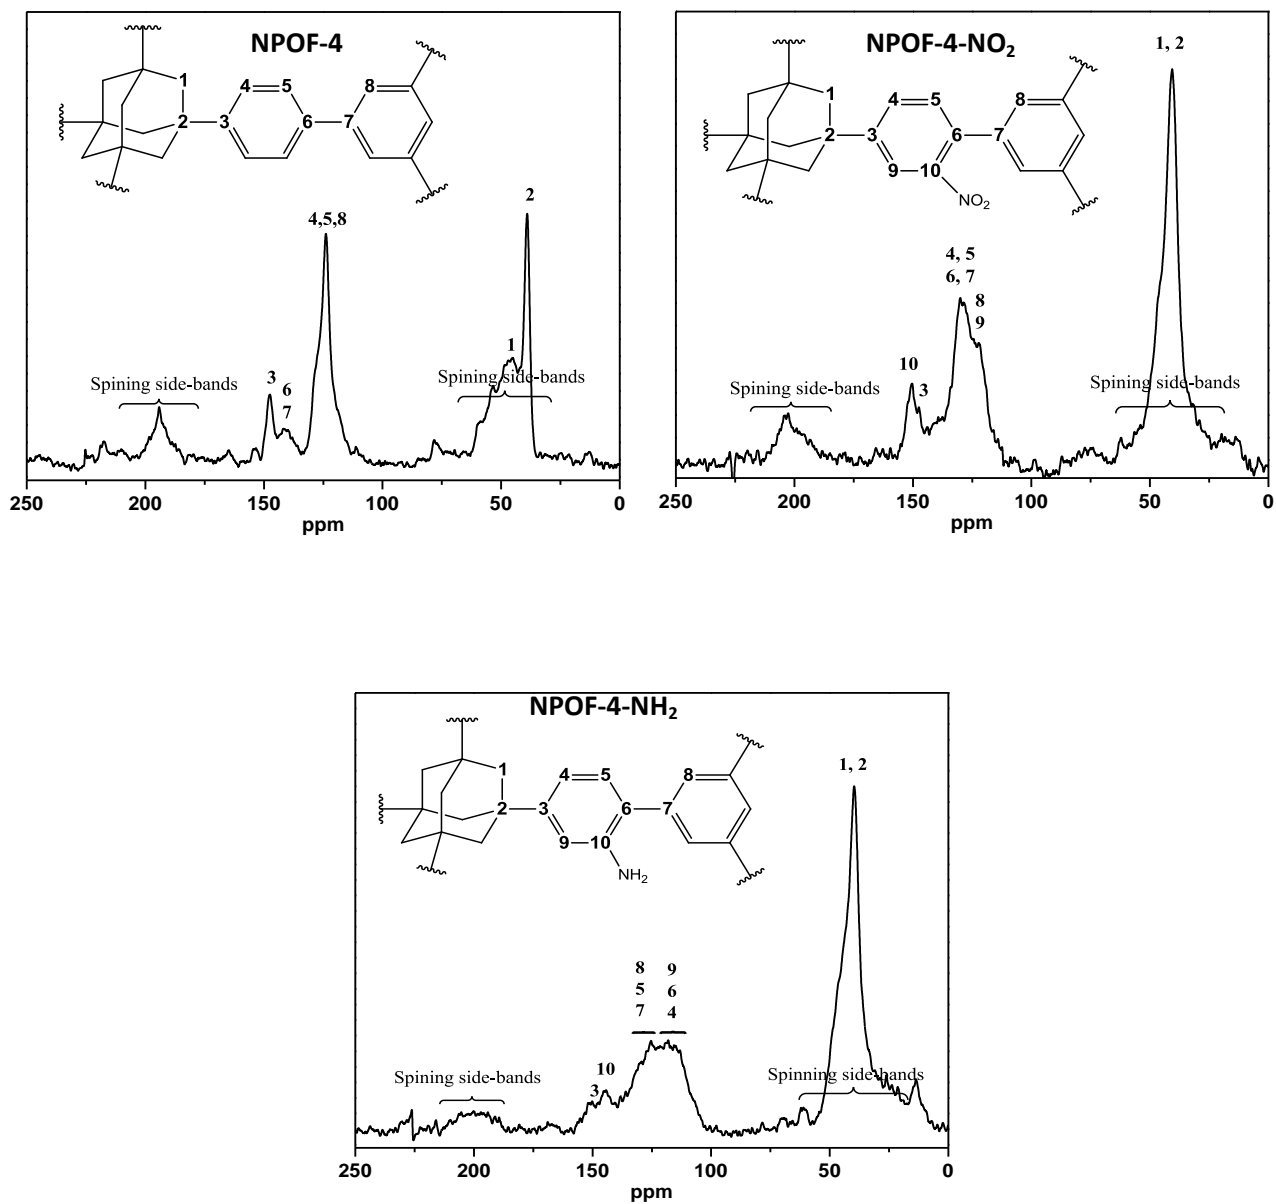

***Section 3: Low-Pressure (0 – 1.0 bar) Gas Adsorption Measurements.***

**Activation of polymers for gas adsorption measurements:** A sample was loaded into a 9 mm large bulb cell (Quantachrome) of known weight and then was degassed at 120 °C /  $1 \times 10^{-5}$  bar for 12 hours. The degassed sample was weighed precisely and then transferred back to the analyzer. The temperature for adsorption measurements was controlled by using refrigerated bath of liquid nitrogen (77 K) or liquid argon (87 K), and temperature controlled water bath (273 K and 298 K). Adsorption measurements were performed on an Autosorb-1 C (Quantachrome) volumetric analyzer using gas adsorbates of UHP grade.

**Figure S8:** Ar adsorption isotherms for NPOF-4, NPOF-4-NO<sub>2</sub> and NPOF-4-NH<sub>2</sub> measured at 87 K. The filled markers are adsorption points and the empty markers are desorption points.

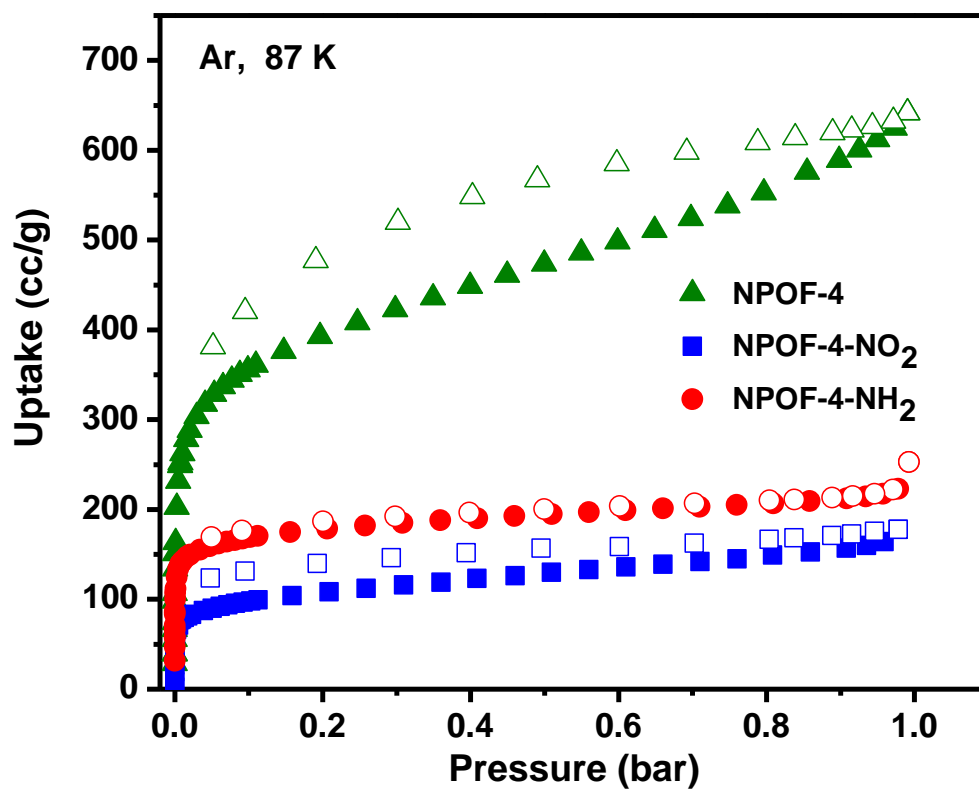

**Figure S9:** Multipoint BET plots for NPOF-4, NPOF-4-NO<sub>2</sub> and NPOF-4-NH<sub>2</sub> calculated from the argon adsorption in the range of  $P/P_o = 0.04$ -0.16.

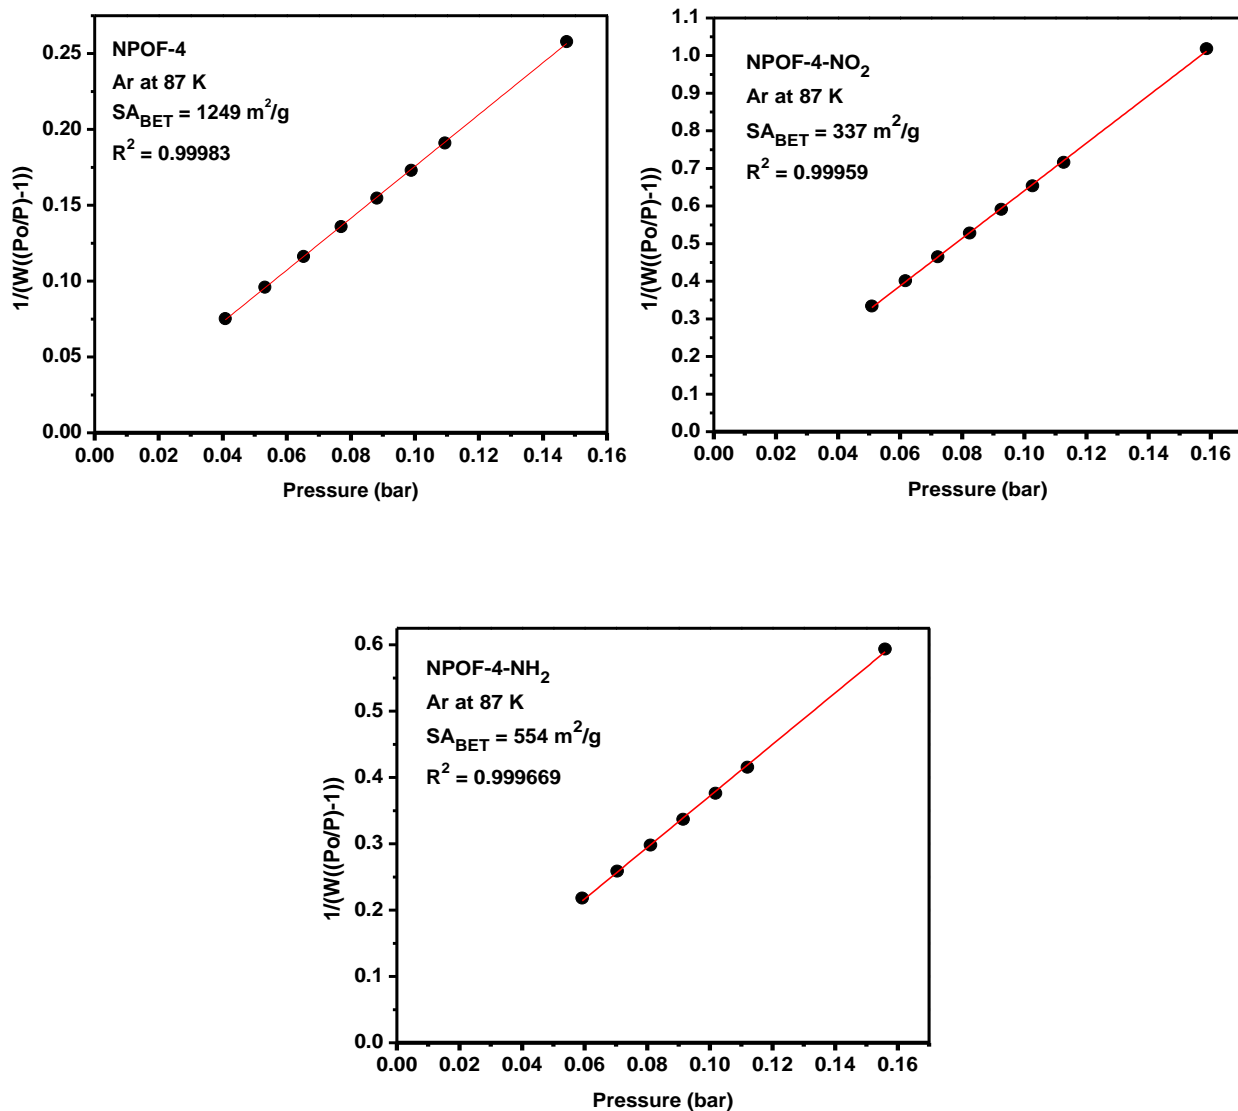

**Figure S10:** Experimental argon adsorption isotherms (filled circles) for NPOF-4, NPOF-4-NO<sub>2</sub> and NPOF-4-NH<sub>2</sub> measured at 87 K. The calculated NLDFT isotherm is overlaid as open circle.

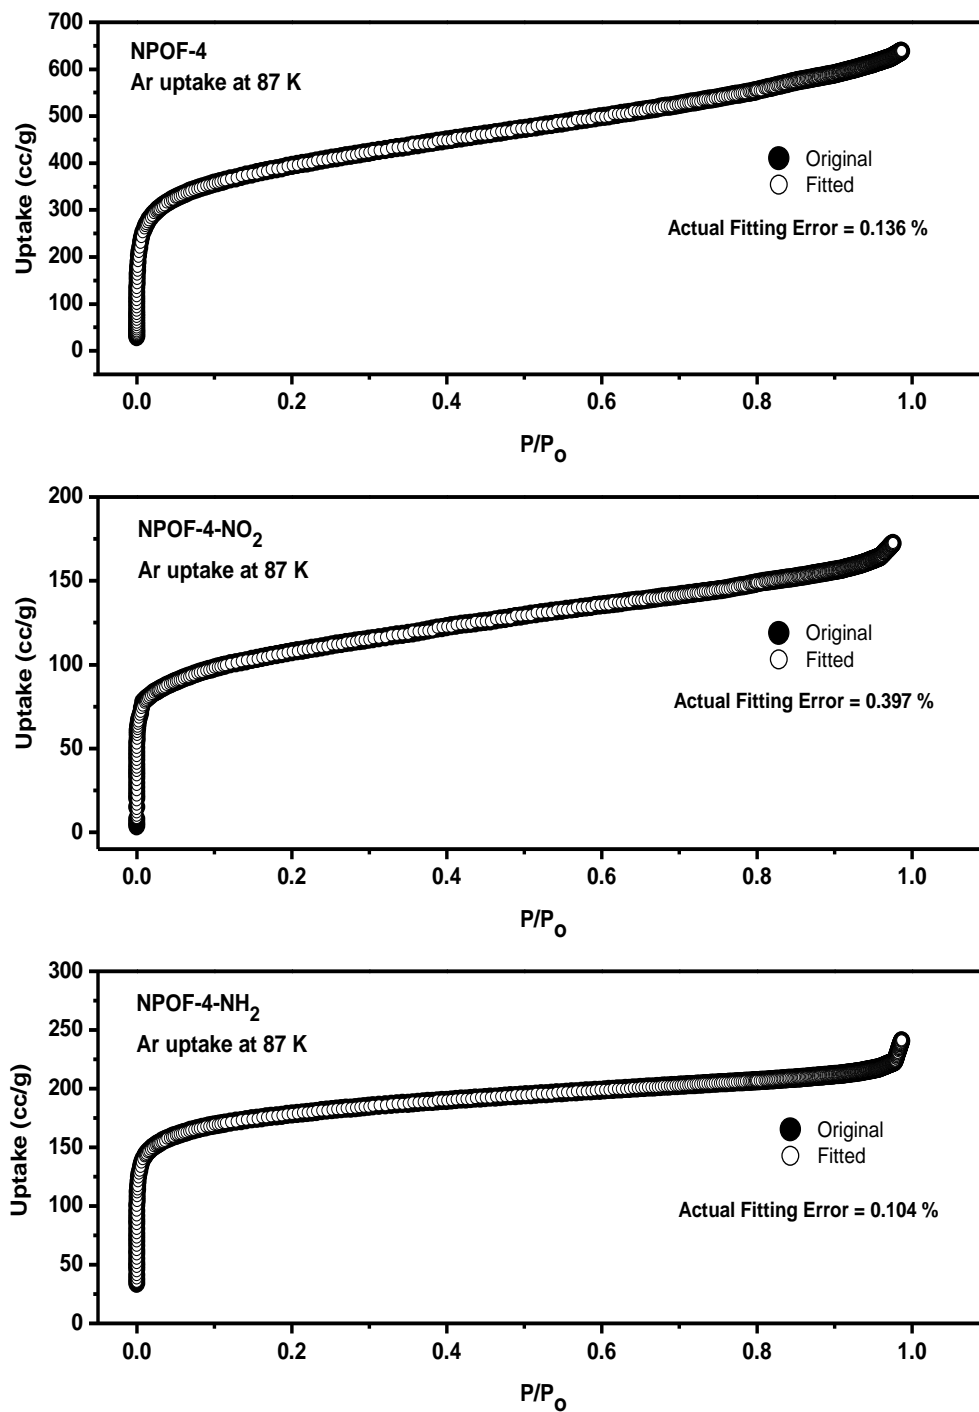

**Figure S11:** Gas uptake isotherms for NPOF-4 (green triangles), NPOF-4-NO<sub>2</sub> (blue squares) and NPOF-4-NH<sub>2</sub> (red circles).

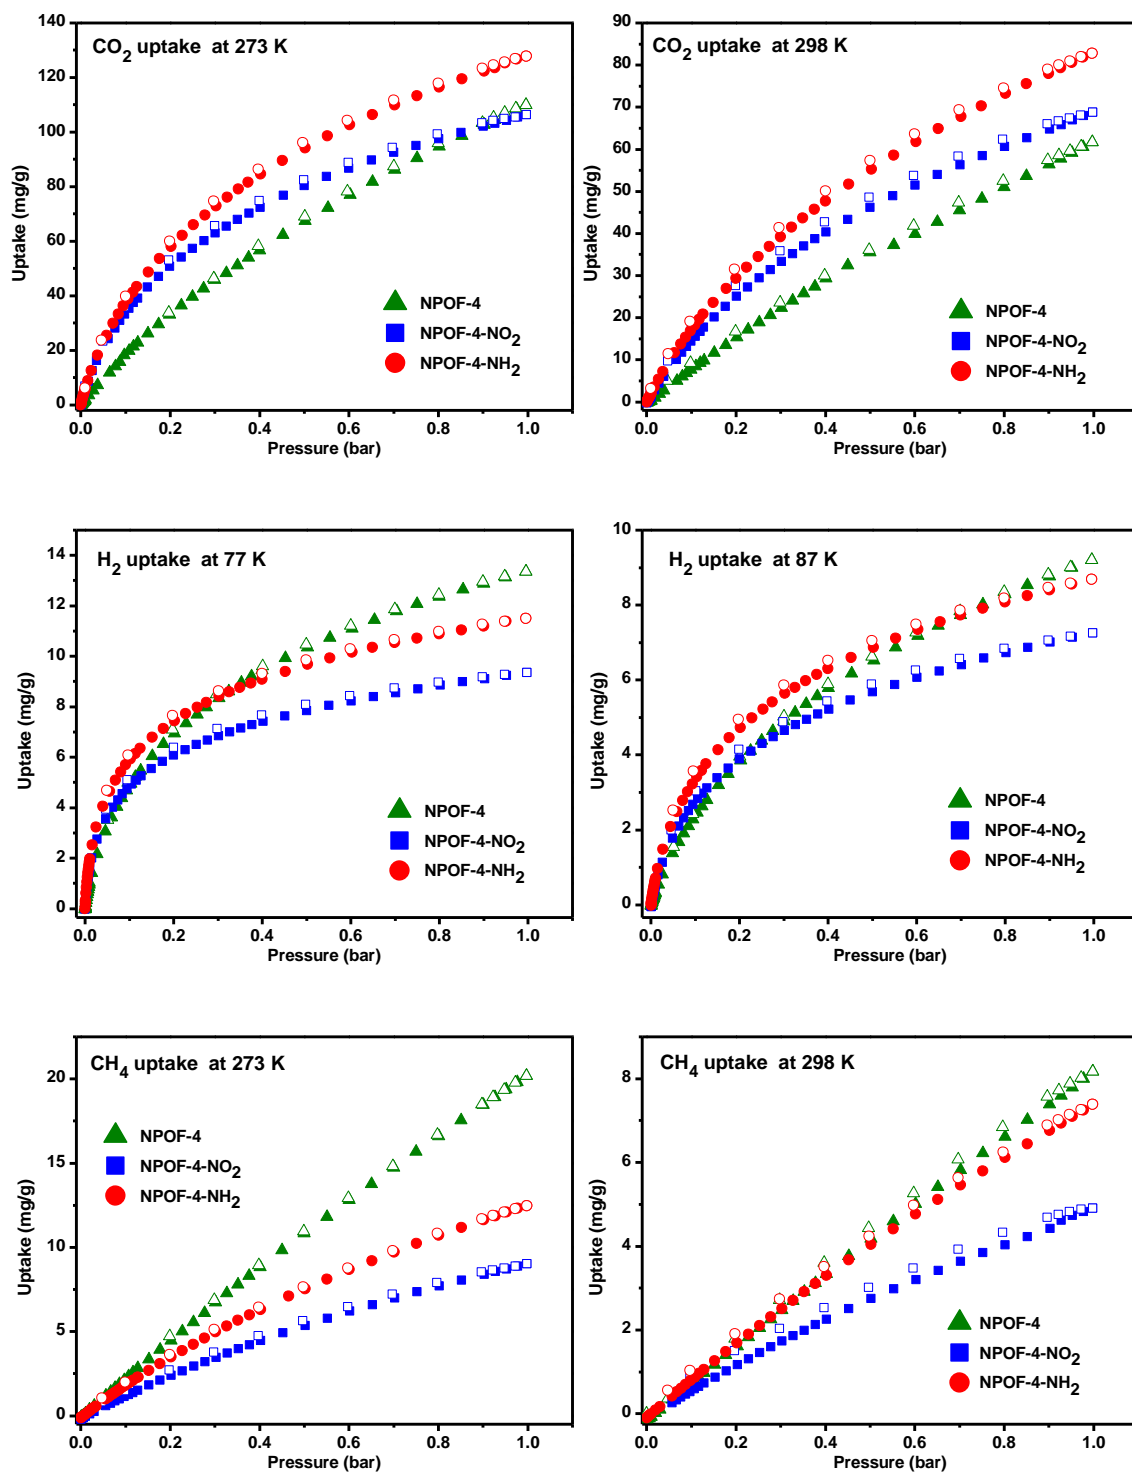

**Figure S12:** Virial analysis<sup>1</sup> of CO<sub>2</sub> adsorption data for NPOF-4, NPOF-4-NO<sub>2</sub> and NPOF-4-NH<sub>2</sub> (blue circles: 273 K, olive squares: 298 K) used for isosteric heat of adsorption ( $Q_{st}$ ) calculations.

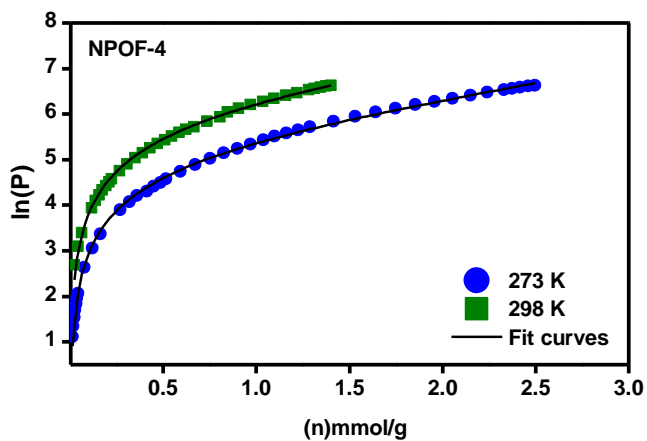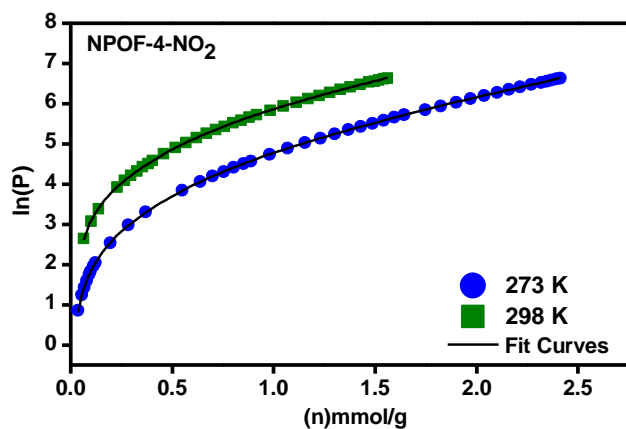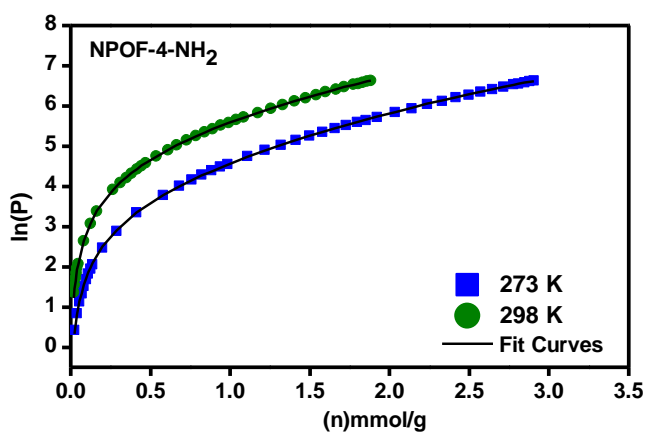



**Figure S13:** Virial analysis<sup>1</sup> of CH<sub>4</sub> adsorption data for NPOF-4, NPOF-4-NO<sub>2</sub> and NPOF-4-NH<sub>2</sub> (blue circles: 273 K, olive squares: 298 K) used for isosteric heat of adsorption ( $Q_{st}$ ) calculations.

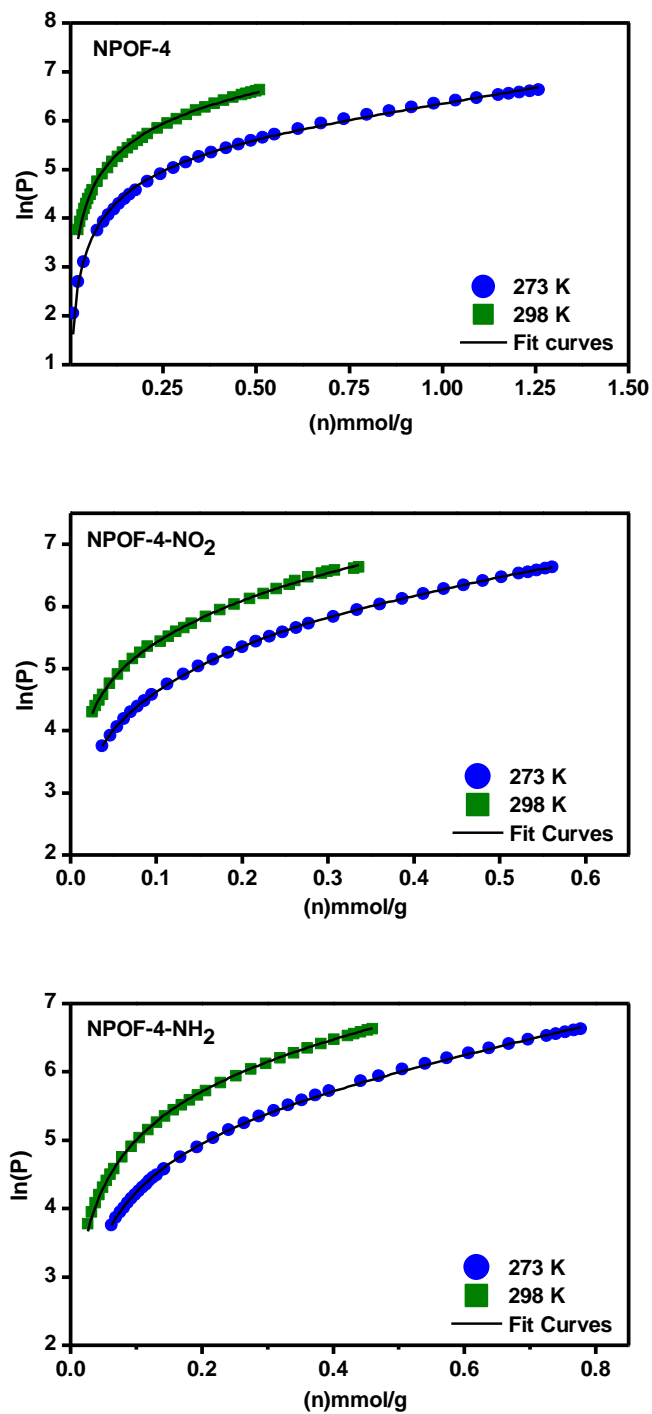

**Figure S14:** Virial analysis<sup>1</sup> of H<sub>2</sub> adsorption data for NPOF-4, NPOF-4-NO<sub>2</sub> and NPOF-4-NH<sub>2</sub> (blue circles: 77 K and olive squares: 87 K) used for isosteric heat of adsorption ( $Q_{st}$ ) calculations.

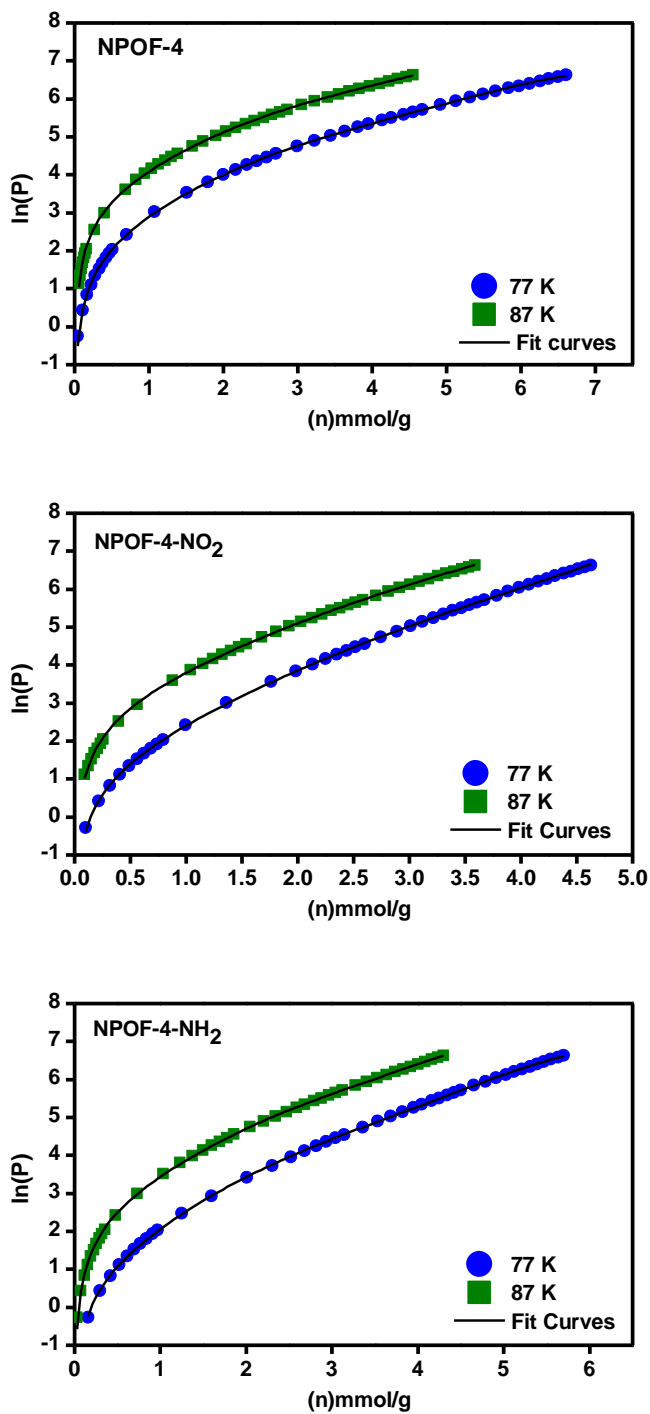

**Figure S15:** Initial slope selectivity studies for NPOF-4, NPOF-4-NO<sub>2</sub> and NPOF-4-NH<sub>2</sub> at 273 K and 298 K (CO<sub>2</sub> over CH<sub>4</sub> and N<sub>2</sub>).<sup>2</sup>

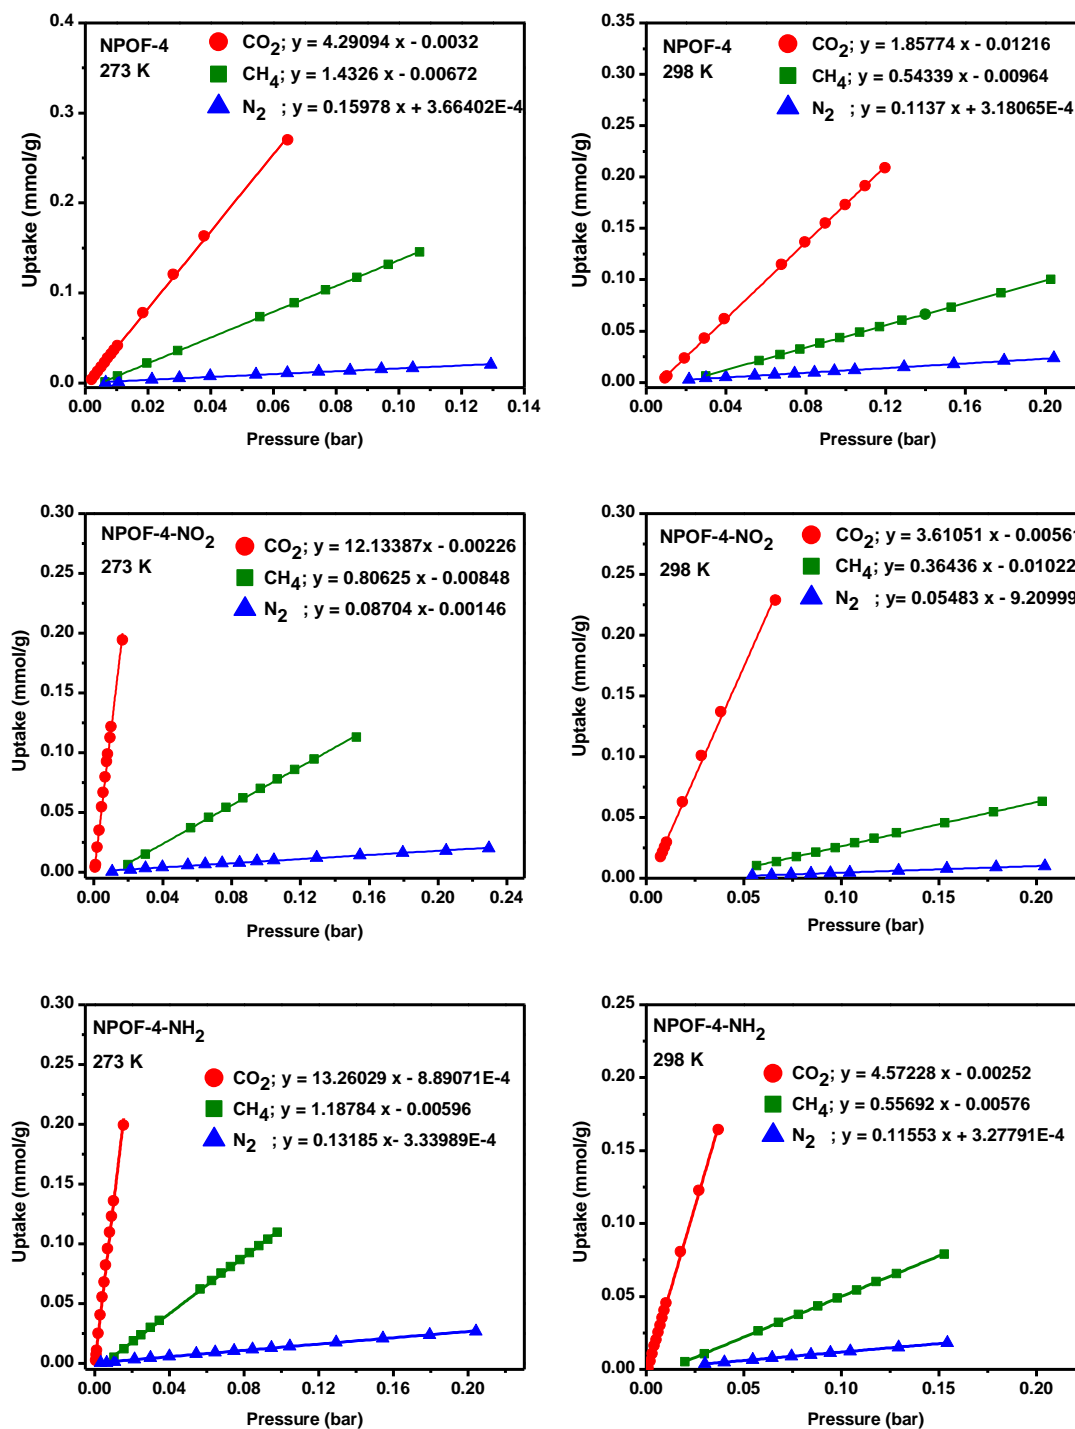

**Table S1:** Hydrogen uptakes and binding affinities for NPOF-4, NPOF-4-NO<sub>2</sub> and NPOF-4-NH<sub>2</sub>.

| Network                | $S_{A_{BET}}$<br>$m^2 g^{-1}$ | H <sub>2</sub> uptakes at 1 bar<br>$mg g^{-1}$ |      | $Q_{st}$<br>$kJ mol^{-1}$ |
|------------------------|-------------------------------|------------------------------------------------|------|---------------------------|
|                        |                               | 77 K                                           | 87 K |                           |
| NPOF-4                 | 1249                          | 13.3                                           | 9.2  | 7.2                       |
| NPOF-4-NO <sub>2</sub> | 337                           | 9.3                                            | 7.2  | 8.3                       |
| NPOF-4-NH <sub>2</sub> | 554                           | 11.5                                           | 8.7  | 8.1                       |

**Table S2:** CO<sub>2</sub> and N<sub>2</sub> uptakes for selectivity studies of CO<sub>2</sub>/N<sub>2</sub> at 273 K and 298 K by using  $S = [q_1/q_2]/[p_1/p_2]$ .<sup>3</sup>

| Material               | 273 K           |               |                |               | 298 K           |               |                |               |
|------------------------|-----------------|---------------|----------------|---------------|-----------------|---------------|----------------|---------------|
|                        | CO <sub>2</sub> |               | N <sub>2</sub> |               | CO <sub>2</sub> |               | N <sub>2</sub> |               |
|                        | Pressure (bar)  | Uptake (mmol) | Pressure (bar) | Uptake (mmol) | Pressure (bar)  | Uptake (mmol) | Pressure (bar) | Uptake (mmol) |
| NPOF-4                 | 0.15            | 0.5932        | 0.75           | 0.0604        | 0.15            | 0.2604        | 0.75           | 0.0956        |
| NPOF-4-NO <sub>2</sub> | 0.15            | 0.9677        | 0.75           | 0.0365        | 0.15            | 0.4475        | 0.75           | 0.0361        |
| NPOF-4-NH <sub>2</sub> | 0.15            | 1.0888        | 0.75           | 0.0676        | 0.15            | 0.5310        | 0.75           | 0.0929        |

**Table S3:** CO<sub>2</sub> and CH<sub>4</sub> uptakes for selectivity studies of CO<sub>2</sub>/CH<sub>4</sub> at 273 K and 298 K by using  $S = [q_1/q_2]/[p_1/p_2]$ .<sup>3</sup>

| Material               | 273 K           |               |                 |               | 298 K           |               |                 |               |
|------------------------|-----------------|---------------|-----------------|---------------|-----------------|---------------|-----------------|---------------|
|                        | CO <sub>2</sub> |               | CH <sub>4</sub> |               | CO <sub>2</sub> |               | CH <sub>4</sub> |               |
|                        | Pressure (bar)  | Uptake (mmol) |
| NPOF-4                 | 0.05            | 0.2133        | 0.95            | 1.2038        | 0.05            | 0.0885        | 0.95            | 0.4841        |
| NPOF-4-NO <sub>2</sub> | 0.05            | 0.4653        | 0.95            | 0.5410        | 0.05            | 0.1796        | 0.95            | 0.3108        |
| NPOF-4-NH <sub>2</sub> | 0.05            | 0.5116        | 0.95            | 0.7507        | 0.05            | 0.2175        | 0.95            | 0.4403        |

Dual-site Langmuir Freundlich (DSLFF) equation

$$q = q_A + q_B = \frac{q_{sat,A} * b_A * p^{\alpha_A}}{1 + b_A * p^{\alpha_A}} + \frac{q_{sat,B} * b_B * p^{\alpha_B}}{1 + b_B * p^{\alpha_B}} \quad \text{Equation S1}$$

In this equation,  $q$  is the amount of gas adsorbed (mmol/g),  $p$  is the pressure (bar),  $q_{sat}$  is the saturation capacity (mmol/g),  $b$  is the Langmuir–Freundlich parameter ( $\text{bar}^{-\alpha}$ ) and  $\alpha$  is the Langmuir–Freundlich exponent (dimensionless) for the site A and B. For  $\text{CO}_2$  isotherms dual-site Langmuir-Freundlich ( $q = q_A + q_B$ ) was employed to get a reasonable fitting. For  $\text{CH}_4$  and  $\text{N}_2$  isotherms single-site Langmuir-Freundlich ( $q = q_A$ ) was able to describe the isotherms sufficiently since there were no discernible isotherm inflections for these isotherms. The parameters obtained from fittings were used for ideal adsorption solution theory (IAST) selectivity calculations which were performed according to previous reports.<sup>4,5</sup>

**Figure S16:** Experimental pure component isotherms for CO<sub>2</sub> (red circle), CH<sub>4</sub> (olive square) and N<sub>2</sub> (blue triangle) at 298 K, and their corresponding isotherm fits (solid black lines) dual-site Langmuir-Freundlich (DSLFF) fits for CO<sub>2</sub> and single-site Langmuir-Freundlich (SSLF) for CH<sub>4</sub> and N<sub>2</sub>.

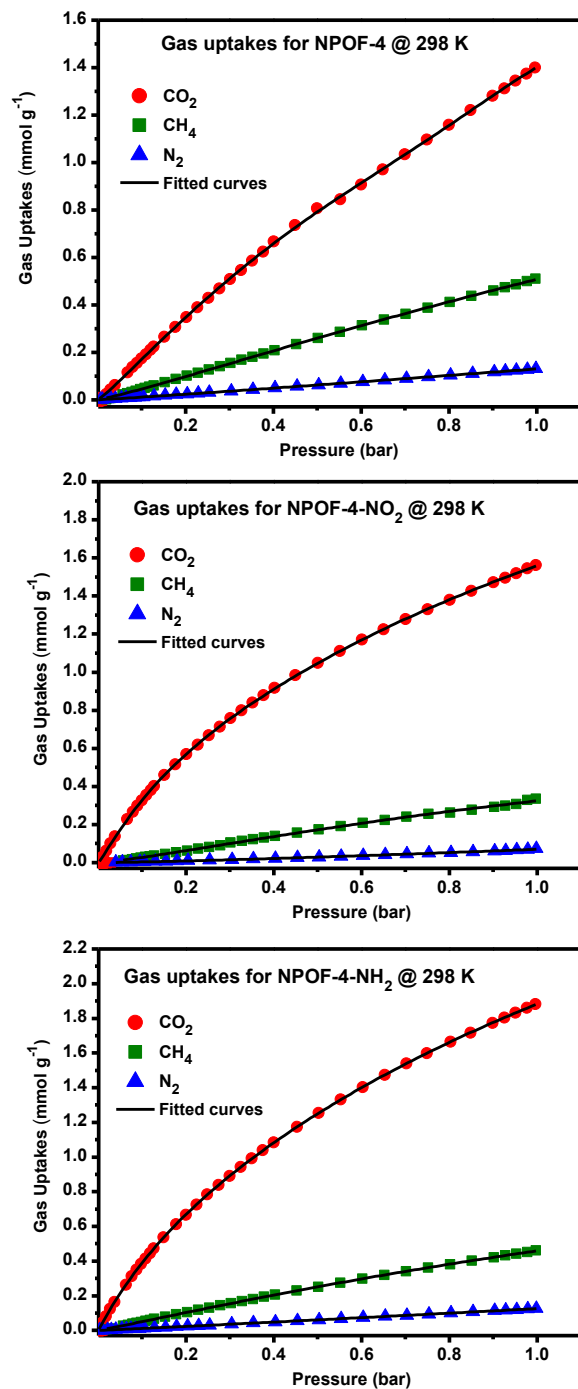

**Figure S17:** IAST selectivities of CO<sub>2</sub> over CH<sub>4</sub> for 50/50 binary mixture at 298 K for NPOF-4, NPOF-4-NO<sub>2</sub> and NPOF-4-NH<sub>2</sub>.

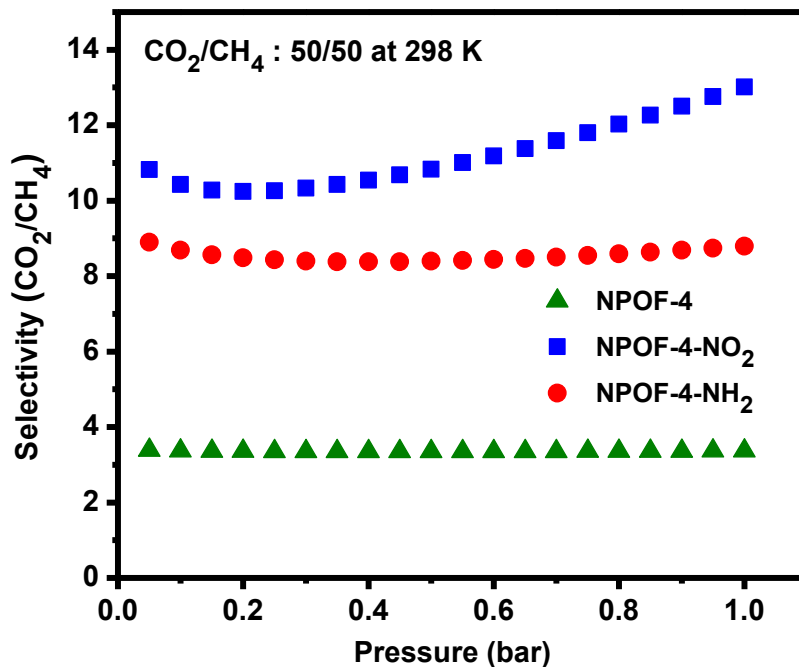

## References

1. M. G. Rabbani, A. K. Sekizkardes, O. M. El-Kadri, B. R. Kaafarani and H. M. El-Kaderi, *J. Mater. Chem.*, 2012, **22**, 25409.
2. J. An, S. J. Geib and N. L. Rosi, *J. Am. Chem. Soc.*, 2009, **132**, 38.
3. K. Sumida, D. L. Rogow, J. A. Mason, T. M. McDonald, E. D. Bloch, Z. R. Herm, T.-H. Bae and J. R. Long, *Chem. Rev.*, 2012, **112**, 724.
4. A. L. Myers and J. M. Prausnitz, *AIChE J.*, 1965, **11**, 121.
5. Z. R. Herm, J. A. Swisher, B. Smit, R. Krishna and J. R. Long, *J. Am. Chem. Soc.*, 2011, **133**, 5664.
